# Supplementary material for: Heavy Metals in Four Marine Fish and Shrimp Species from a Subtropical Coastal Area: Accumulation and Consumer Health Risk Assessment
Source: MDPI journal article supplement (doi:10.3390/biology11121780), 2022-12-07
Supplement: s1 [file s1]

**Table S1:** Water quality parameters of the study area after Begum et al. [1]

|   |              |                       |
|---|--------------|-----------------------|
| 1 | Parameters   | Range                 |
| 2 | pH           | 7.72 to 7.91          |
| 3 | Temperature  | 19.1 to 19.6 °C       |
| 4 | Salinity     | 0.5 to 17 ppt         |
| 5 | Hardness     | 94 to 126 mg/L        |
| 6 | DO           | 3.33 to 4.3 mg/L      |
| 7 | BOD          | 1.23 to 2.9 mg/L      |
| 8 | Conductivity | 525 to 714 $\mu$ S/cm |
| 9 | TDS          | 113 to 197.67 mg/L    |

1. Begum, S.; Islam, M.S.; Rehnuma, M.; Kabir, M.H.; Tusher, T.R. Water quality and fish diversity status in Meghna River at Narsingdi in Bangladesh. *Bangladesh J. Environ. Sci.* **2019**, *37*, 25–31.
